# Supplementary material for: Genomic Features of Parthenogenetic Animals
Source: PubMed Central journal article supplement (PMC7953838; doi:10.1093/jhered/esaa031), 2020-09-28
Supplement: esaa031_suppl_supplementary_table_1.pdf [file esaa031_suppl_supplementary_table_1.pdf]

**Supplementary table 1: Overview of analysed species.** This information was collected directly from the cited literature. References include information regarding cellular mode of reproduction, origin of asexuality and/or the age of asexuality.

| species                            | common name       | NCBI accession               | cellular mechanism of parthenogenesis | evidence                                                                                    | hybrid origin | age of asexuality [y] | references |
|------------------------------------|-------------------|------------------------------|---------------------------------------|---------------------------------------------------------------------------------------------|---------------|-----------------------|------------|
| <i>Poecilia formosa</i>            | amazon molly      | SAMN01797685                 | sperm-dependent functional mitotic    | cytology, genetics                                                                          | yes           | 100 k                 | [1]        |
| <i>Adineta vaga</i>                | bdelloid rotifer  | SAMEA2043852                 | functional mitotic                    | stained karyotypes have no apparent chromosome pairs                                        |               | 46 M                  | [2, 3]     |
| <i>Adineta ricciae</i>             | bdelloid rotifer  | SAMEA104393659               | functional mitotic                    |                                                                                             |               | 46 M                  | [3, 4]     |
| <i>Rotaria macrura</i>             | bdelloid rotifer  | SAMEA104393678               | functional mitotic                    | no direct evidence <sup>1</sup>                                                             |               | 46 M                  | [5, 6]     |
| <i>Rotaria magnacalcarata</i>      | bdelloid rotifer  | SAMEA104393684               | functional mitotic                    | no direct evidence <sup>1</sup>                                                             |               | 46 M                  | [5, 6]     |
| <i>Leptopilina clavipes</i>        | parasitoid wasp   | SAMN02047179                 | gamete duplication <sup>2</sup>       | cytology                                                                                    | no            | 6-43 k                | [7]        |
| <i>Trichogramma pretiosum</i>      | trichogramma wasp | SAMN02439301                 | gamete duplication <sup>2</sup>       | cytology, genetic markers                                                                   | no            | "few"                 | [8, 9]     |
| <i>Ooceraea biroi</i> <sup>3</sup> | raider ant        | SAMN02428046                 | central fusion                        | cytology, RAD seq                                                                           | no            |                       | [10]       |
| <i>Apis mellifera capensis</i>     | cape honey bee    | SAMN10245904<br>SAMN10245906 | central fusion                        | cytology                                                                                    | no            | 20                    | [11]       |
| <i>Aptinothrips rufus</i>          | thrip             |                              | gamete duplication <sup>4</sup>       |                                                                                             | no            | 150-200 k             | [12]       |
| <i>Folsomia candida</i>            | springtail        | SAMN04196550                 | terminal fusion <sup>4</sup>          | cytology                                                                                    | no            |                       | [13]       |
| <i>Daphnia pulex</i>               | water flea        | SAMN03964753<br>SAMN03964750 | central fusion equivalent             | No separation at meiosis I; abortive meiosis                                                | yes           | 1-170 k               | [14]       |
| <i>Procambarus virginalis</i>      | marbled crayfish  | SAMN07142640                 | functional mitotic                    | microsat study, histological evidence                                                       |               | less than 30          | [15–17]    |
| <i>Plectus sambesii</i>            | nematode          | SAMN07227113                 | unknown meiotic                       | 2 meiotic divisions, 2 polar bodies, but no fusions were observed, putative endoduplication |               |                       | [18]       |
| <i>Mesorhabditis belari</i>        | nematode          | SAMEA5150020                 | unknown meiotic                       | cytology; 2 meiotic divisions observed                                                      |               |                       | [19]       |
| <i>Diploscapter coronatus</i>      | nematode          | SAMD00025087                 | unknown                               |                                                                                             | yes           |                       | [18, 20]   |

<sup>1</sup>Meiosis was not observed in two bdelloid rotifers *Habrotrocha tridens* and *Philodina roseola*, both members of *Philodinidae*, the same family as *Rotaria*.

<sup>2</sup>*Wolbachia* induced

<sup>3</sup>formerly *Cerapachys biroi*

<sup>4</sup>suggested that it is endosymbiont induced

|                                  |                                   |                                              |                            |                                                                                                                     |     |                   |          |
|----------------------------------|-----------------------------------|----------------------------------------------|----------------------------|---------------------------------------------------------------------------------------------------------------------|-----|-------------------|----------|
| <i>Diploscapter pachys</i>       | nematode                          | SAMN03456257                                 | functional mitotic         | formally central fusion (meiosis I skipped), no recombination, only sister chromatid separation                     | yes | 18 M <sup>5</sup> | [21]     |
| <i>Panagrolaimus davidi</i>      | nematode                          | SAMN02741088                                 | unknown                    | polar body produced                                                                                                 | yes | 1.3-8.5 M         | [22]     |
| <i>Acroboloides nanus</i>        | nematode                          | SAMN06041019                                 | unknown meiotic            |                                                                                                                     |     |                   | [18]     |
| <i>Meloidogyne incognita</i>     | root-knot nematode                | SAMEA104032784<br>SAMN05712521               | functional mitotic         |                                                                                                                     | yes | "recently"        | [23–25]  |
| <i>Meloidogyne javanica</i>      | root-knot nematode                | SAMEA3298191<br>SAMN05712519                 | functional mitotic         |                                                                                                                     | yes | "recently"        | [25]     |
| <i>Meloidogyne arenaria</i>      | root-knot nematode                | SAMEA3298190<br>SAMN05712513<br>SAMN08721831 | functional mitotic         |                                                                                                                     | yes | "recently"        | [25]     |
| <i>Meloidogyne floridensis</i>   | peach root-knot nematode          | SAMN05712529                                 | unknown                    | meiotic mechanism suggested by cytology; however the study conflicts in ploidy with the data in this study (see S1) | yes | "recently"        | [25, 26] |
| <i>Meloidogyne enterolobii</i>   | root-knot nematode                | SAMN05712528                                 | functional mitotic         |                                                                                                                     | yes | "recently"        | [25]     |
| <i>Hypsibius dujardini</i>       | tardigrade; water bear            | SAMEA3679301                                 | terminal fusion equivalent | meiosis II suppressed                                                                                               |     |                   | [27]     |
| <i>Ramazzottius varieornatus</i> | tardigrade; water bear; Kumamushi | SAMD00054187                                 |                            | no males have been found                                                                                            |     |                   | 6        |

<sup>5</sup>Assuming non-hybrid origin suggested by Hiraki et al. 2017.

<sup>6</sup>personal communication with Mark Blaxter

## References

- [1] Lamatsch DK, Steinlein C, Schmid M, Scharl M. Noninvasive determination of genome size and ploidy level in fishes by flow cytometry: detection of triploid *Poecilia formosa*. *Cytometry*. 2000 feb;39(2):91–95. Available from: [https://doi.org/10.1002/\(sici\)1097-0320\(20000201\)39:2<91::aid-cyto1>3.0.co;2-4](https://doi.org/10.1002/(sici)1097-0320(20000201)39:2<91::aid-cyto1>3.0.co;2-4).
- [2] Mark Welch JL, Meselson M. Karyotypes of bdelloid rotifers from three families. *Hydrobiologia*. 1998;387/387:403–407. Available from: <https://doi.org/10.1023/a:1017007131386>.
- [3] Mark Welch DB, Meselson M. Oocyte nuclear DNA content and GC proportion in rotifers of the anciently asexual Class Bdelloidea. *Biological Journal of the Linnean Society*. 2003 may;79(1):85–91. Available from: <https://doi.org/10.1046/j.1095-8312.2003.00180.x>.
- [4] Pouchkina-Stantcheva NN, McGee BM, Boschetti C, Tolleter D, Chakrabortee S, Popova AV, et al. Functional Divergence of Former Alleles in an Ancient Asexual Invertebrate. *Science*. 2007 oct;318(5848):268–271. Available from: <https://doi.org/10.1126/science.1144363>.
- [5] Hsu WS. Oogenesis in the Bdelloidea rotifer *Philodina roseola* Ehrenberg. *Cellule*. 1956;57:283–296.
- [6] Hsu WS. Oogenesis in *Habrotrocha tridens* (Milne). *The Biological Bulletin*. 1956;111(3):364–374.
- [7] Pannebakker BA, Pijnacker LP, Zwaan BJ, Beukeboom LW. Cytology of Wolbachia-induced parthenogenesis in *Leptopilina clavipes* (Hymenoptera: Figitidae). *Genome*. 2004 apr;47(2):299–303. Available from: <https://doi.org/10.1139/g03-137>.
- [8] Ardila-Garcia AM, Umphrey GJ, Gregory TR. An expansion of the genome size dataset for the insect order Hymenoptera, with a first test of parasitism and eusociality as possible constraints. *Insect Molecular Biology*. 2010 feb;19(3):337–346. Available from: <https://doi.org/10.1111/j.1365-2583.2010.00992.x>.
- [9] Gokhman VE, Pereira FF, Costa MA. A cytogenetic study of three parasitic wasp species (Hymenoptera, Chalcidoidea, Eulophidae, Trichogrammatidae) from Brazil using chromosome morphometrics and base-specific fluorochrome staining. *Comparative Cytogenetics*. 2017 mar;11(1):179–188. Available from: <https://doi.org/10.3897/compcytogen.v11i1.11706>.
- [10] Oxley PR, Ji L, Fetter-Pruneda I, McKenzie SK, Li C, Hu H, et al. The Genome of the Clonal Raider Ant *Cerapachys biroi*. *Current Biology*. 2014 feb;24(4):451–458. Available from: <https://doi.org/10.1016/j.cub.2014.01.018>.
- [11] Verma S, Ruttner F. Cytological analysis of the thelytokous parthenogenesis in the Cape honeybee (*Apis mellifera capensis* Escholtz). *Apidologie*. 1983;14(1):41–57.
- [12] Fontcuberta García-Cuenca A, Dumas Z, Schwander T. Extreme genetic diversity in asexual grass thrips populations. *Journal of evolutionary biology*. 2016;29(5):887–899.
- [13] Riparbelli MG, Giordano R, Callaini G. Centrosome inheritance in the parthenogenetic egg of the collembolan *Folsomia candida*. *Cell and Tissue Research*. 2006 aug;326(3):861–872. Available from: <https://doi.org/10.1007/s00441-006-0253-x>.
- [14] Hiruta C, Nishida C, Tochinai S. Abortive meiosis in the oogenesis of parthenogenetic *Daphnia pulex*. *Chromosome Research*. 2010;18(7):833–840.

- [15] Vogt G, Tolley L, Scholtz G. Life stages and reproductive components of the Marmorkrebs (marbled crayfish), the first parthenogenetic decapod crustacean. *Journal of Morphology*. 2004;261(3):286–311. Available from: <https://doi.org/10.1002/jmor.10250>.
- [16] Martin P, Thonagel S, Scholtz G. The parthenogenetic Marmorkrebs (Malacostraca: Decapoda: Cambaridae) is a triploid organism. *Journal of Zoological Systematics and Evolutionary Research*. 2015 nov;54(1):13–21. Available from: <https://doi.org/10.1111/jzs.12114>.
- [17] Vogt G, Falckenhayn C, Schrimpf A, Schmid K, Hanna K, Panteleit J, et al. The marbled crayfish as a paradigm for saltational speciation by autopolyploidy and parthenogenesis in animals. *Biology open*. 2015;p. bio-014241.
- [18] Lahl V, Sadler B, Schierenberg E. Egg development in parthenogenetic nematodes: variations in meiosis and axis formation. *The International Journal of Developmental Biology*. 2006;50(4):393–397. Available from: <https://doi.org/10.1387/ijdb.052030v1>.
- [19] Grosmaire M, Launay C, Siegwald M, Brugière T, Estrada-Virrueta L, Berger D, et al. Males as somatic investment in a parthenogenetic nematode. *Science*. 2019;363(6432):1210–1213.
- [20] Hiraki H, Kagoshima H, Kraus C, Schiffer PH, Ueta Y, Kroiher M, et al. Genome analysis of *Diploscapter coronatus*: insights into molecular peculiarities of a nematode with parthenogenetic reproduction. *BMC Genomics*. 2017 jun;18(1). Available from: <https://doi.org/10.1186/s12864-017-3860-x>.
- [21] Fradin H, Kiontke K, Zegar C, Gutwein M, Lucas J, Kovtun M, et al. Genome Architecture and Evolution of a Unichromosomal Asexual Nematode. *Current Biology*. 2017 oct;27(19):2928–2939.e6. Available from: <https://doi.org/10.1016/j.cub.2017.08.038>.
- [22] Schiffer PH, Danchin E, Burnell AM, Schiffer AM, Creevey C, Wong S, et al. Signatures of the evolution of parthenogenesis and cryptobiosis in panagrolaimid nematodes. *bioRxiv*. 2018; Available from: <https://www.biorxiv.org/content/early/2018/06/27/159152>.
- [23] Triantaphyllou A. Oogenesis and the Chromosomes of the Parthenogenic Root-knot Nematode *Meloidogyne incognita*. *Journal of nematology*. 1981;13(2):95.
- [24] Van der Beek JG, Los JA, Pijnacker LP. Cytology of parthenogenesis of five *Meloidogyne* species. *Fundamental and applied nematology*. 1998;21(4):393–399.
- [25] Lunt DH, Kumar S, Koutsovoulos G, Blaxter ML. The complex hybrid origins of the root knot nematodes revealed through comparative genomics. *PeerJ*. 2014;2:e356.
- [26] Handoo Z, Nyczepir A, Esmenjaud D, Van der Beek J, Castagnone-Sereno P, Carta L, et al. Morphological, molecular, and differential-host characterization of *Meloidogyne floridensis* n. sp. (Nematoda: Meloidogynidae), a root-knot nematode parasitizing peach in Florida. *Journal of nematology*. 2004;36(1):20.
- [27] Ammermann D. Die Cytologie der Parthenogenese bei dem Tardigraden *Hypsibius dujardini*. *Chromosoma*. 1967;23(2):203–213. Available from: <https://doi.org/10.1007/bf00331113>.
